# Supplementary material for: Polyethyleneimine-impregnated activated carbon nanofiber composited graphene-derived rice husk char for efficient post-combustion CO 2 capture
Source: publisher site journal article supplement (doi:10.1515/ntrev-2022-0055), 2022-01-01
Supplement: Supplementary file 1 [file ntrev-2022-0055_sm.pdf]

# Supplementary material

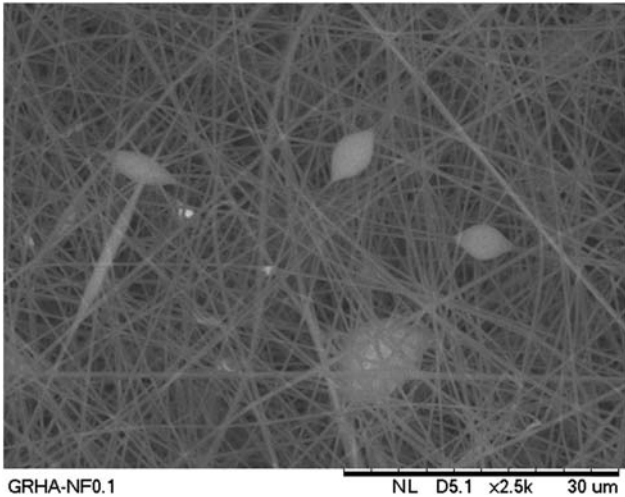

**Figure S1:** The appearance of beads and large fiber diameter in NF with the highest loading of GRHC.

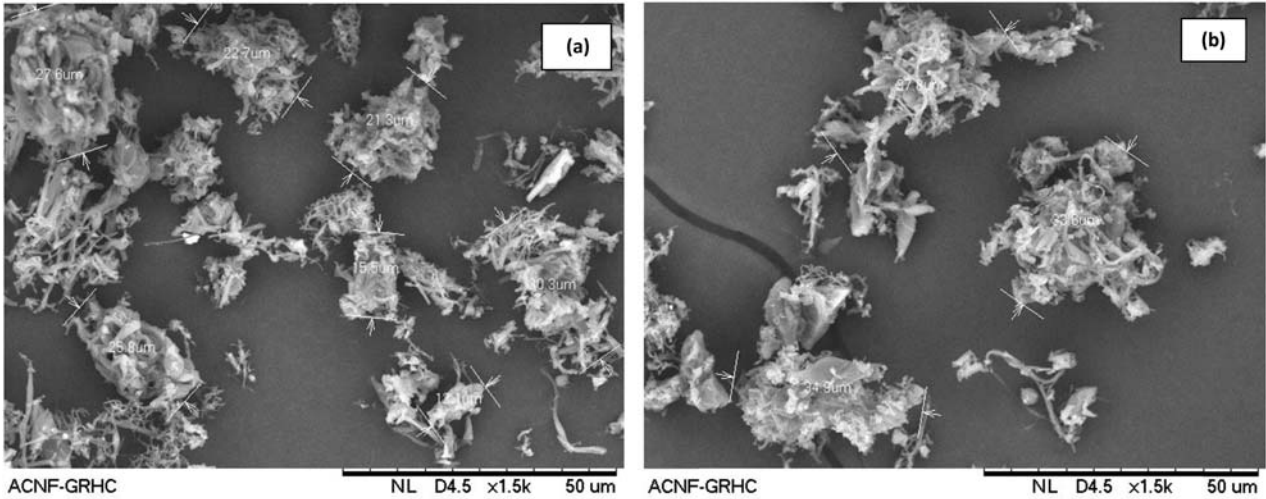

**Figure S2:** (a and b) The average particle size of GRHC/ACNF at two different spots at 1,500× magnification.

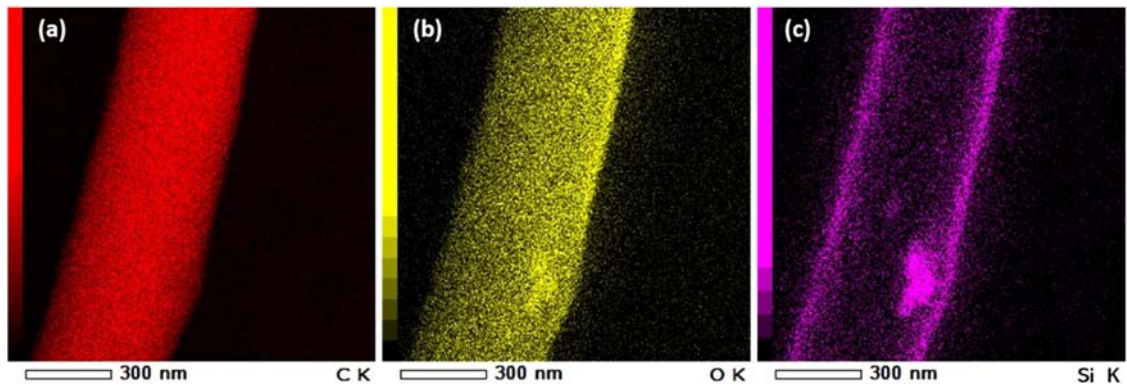

**Figure S3:** EDX mapping of ACNF incorporated with GRHC (GRHC/ACNF).
